# Supplementary material
Source: Royal Society of Chemistry journal article supplement (doi:10.1039/d6ta00732e)
Supplement: d6ta00732e1.pdf [file d6ta00732e1.pdf]

## **Robust Flexible Janus Composites for Absorption- Dominated EMI Shielding**

Yuqi Wang<sup>abc</sup>, Mingpu Li<sup>de</sup>, Zhiwei Wang<sup>de</sup>, Linli Tan<sup>\*de</sup>, Na Han<sup>\*abc</sup>, Yingbo Chen<sup>abc</sup>

a School of Materials Science and Engineering, Tiangong University, Tianjin, 300387, China

b State Key Lab of Separation Membranes and Membrane Processes, Tianjin 300387, China

c Tianjin Municipal Key Lab of Advanced Fiber and Energy Storage Technology, Tianjin 300387, China

d College of Intelligent Systems Science and Technology, Hubei Minzu University, Enshi, Hubei 445000, P. R. China

e Key Laboratory of Green Manufacturing of Super-light Elastomer Materials of State Ethnic Affairs Commission, Hubei Minzu University, Enshi, Hubei 445000, P. R. China

Corresponding author:

[2019042@hbmzu.edu.cn](mailto:2019042@hbmzu.edu.cn) (Linli Tan)

[hanna@tiangong.edu.cn](mailto:hanna@tiangong.edu.cn) (Na Han)

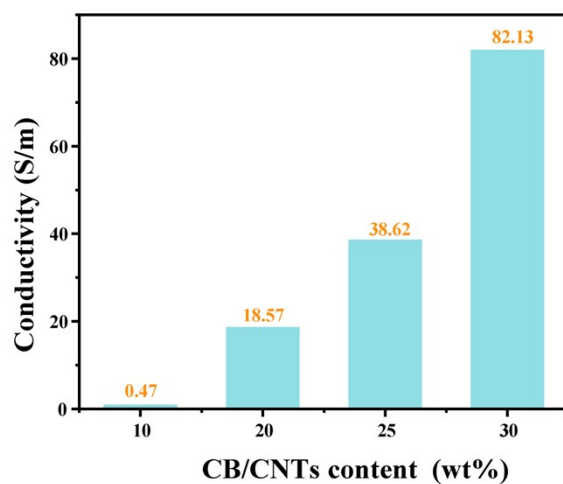

**Fig. S1.** Electrical conductivity of the EPDM/POE-based reflective layers with various CB/CNT loadings.

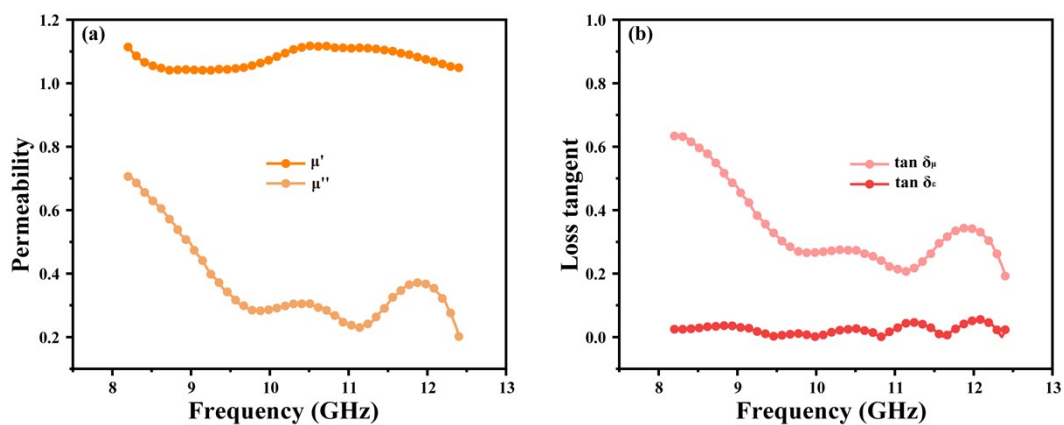

**Fig. S2** (a) complex permeability ( $\mu'$ ,  $\mu''$ ) and (b) comparison of magnetic loss tangent ( $\tan \delta_\mu$ ) and dielectric loss tangent ( $\tan \delta_\epsilon$ ).

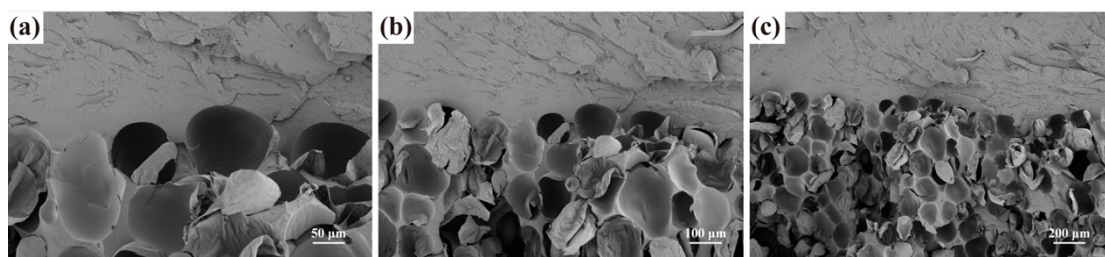

**Fig. S3** Cross-sectional image of the composite after 500 cycles.

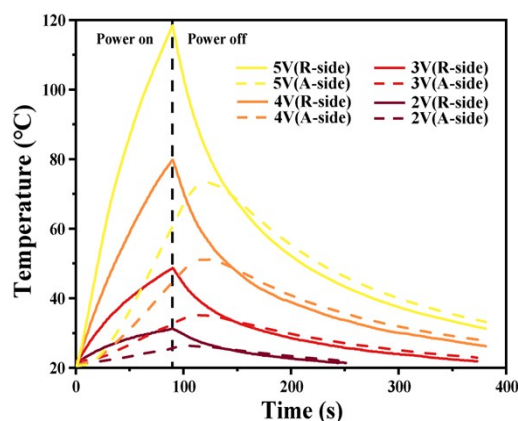

**Fig. S4** Real-time Joule heating profiles of the R side (solid lines) and A side (dashed lines) under various DC voltages (2–5 V) at an ambient temperature of 15 °C.

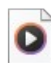

Shielding test.mp4

**Video S1.** Real-time demonstration of the EMI shielding efficiency of the E/P/C30/Fe<sub>3</sub>O<sub>4</sub>@TEMs composite.

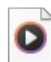

Bending and twisting of the composite.mp4

**Video S2.** Real-time demonstration of the flexibility of the E/P/C30/Fe<sub>3</sub>O<sub>4</sub>@TEMs composite.

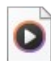

Joule heating\_5V.mp4

**Video S3.** Joule heating performance of the composite film under an applied voltage of 5 V.

**Table S1.** EMI shielding performance of various shielding materials.

| Filler                                | Filler content               | matrix        | EMI SE<br>(dB) | Density<br>(g cm <sup>-3</sup> ) | SSE<br>(dB cm <sup>3</sup><br>g <sup>-1</sup> ) | ref              |
|---------------------------------------|------------------------------|---------------|----------------|----------------------------------|-------------------------------------------------|------------------|
| Copper                                | Bulk                         | /             | 90.0           | 9.0                              | 9.0                                             | [1]              |
| Stainless steel                       | Bulk                         | /             | 89.0           | 8.1                              | 10.98                                           | [1]              |
| Al foil                               | Bulk                         | /             | 66.0           | 2.7                              | 24.44                                           | [2]              |
| Stainless steel                       | 1.1 vol%                     | PP            | 48.0           | 0.64                             | 75.0                                            | [3]              |
| Ni/PPy                                | 54.39 wt%                    | PET           | 77.87          | 1                                | 77.87                                           | [4]              |
| MXene                                 | 90 wt%                       | SA            | 57.0           | 2.3                              | 24.78                                           | [5]              |
| Fe <sub>3</sub> O <sub>4</sub> /MXene | 4 wt%/20 mg cm <sup>-2</sup> | Cellulose/PAN | 33.0           | 0.59                             | 55.93                                           | [6]              |
| CB/CNT/Fe <sub>3</sub> O <sub>4</sub> | 30 wt% (7:3) /5 wt%          | EPDM/POE      | 40.0           | 0.52                             | 76.92                                           | <b>This work</b> |

## Reference

- [1] X. Shui, D.D.L. Chung, Nickel filament polymer-matrix composites with low surface impedance and high electromagnetic interference shielding effectiveness, *J. Electron. Mater.* 26 (1997) 928–934. <https://doi.org/10.1007/s11664-997-0276-4>.
- [2] D. Wanasinghe, F. Aslani, A review on recent advancement of electromagnetic interference shielding novel metallic materials and processes, *Composites, Part B* 176 (2019) 107207. <https://doi.org/10.1016/j.compositesb.2019.107207>.
- [3] A. Ameli, M. Nofar, S. Wang, C.B. Park, Lightweight polypropylene/stainless-steel fiber composite foams with low percolation for efficient electromagnetic interference shielding, *ACS Appl. Mater. Interfaces* 6 (2014) 11091–11100. <https://doi.org/10.1021/am500445g>.
- [4] Q. Liu, C. Yi, J. Chen, M. Xia, Y. Lu, Y. Wang, X. Liu, M. Li, K. Liu, D. Wang, Flexible, breathable, and highly environmental-stable ni/PPy/PET conductive fabrics for efficient electromagnetic interference shielding and wearable textile antennas, *Composites, Part B* 215 (2021) 108752. <https://doi.org/10.1016/j.compositesb.2021.108752>.
- [5] F. Shahzad, M. Alhabeab, C.B. Hatter, B. Anasori, S. Man Hong, C.M. Koo, Y. Gogotsi, Electromagnetic interference shielding with 2D transition metal carbides (MXenes), *Science* 353 (2016) 1137–1140. <https://doi.org/10.1126/science.aag2421>.
- [6] X. Tan, Y. He, C. Wang, Y. Zhang, W. Wang, H. Li, R. Yu, Hierarchical mxene/Fe<sub>3</sub>O<sub>4</sub>/cellulose nanofiber composites with layer-by-layer architecture for high-performance electromagnetic interference shielding, *Compos Sci Technol* 265 (2025) 111136. <https://doi.org/10.1016/j.compscitech.2025.111136>.
